# Supplementary material for: Antibacterial and Antibiofilm Effects of Lactobacilli Strains against Clinical Isolates of Pseudomonas aeruginosa under Conditions Relevant to Cystic Fibrosis
Source: MDPI journal article supplement (doi:10.3390/antibiotics12071158), 2023-07-07
Supplement: s1 [file s1]

**Table S1.** Species/strains of lactobacilli used in the study

| Strain Code  | Species                              | Commercial product | Strains declared by the manufacturer |
|--------------|--------------------------------------|--------------------|--------------------------------------|
| LR ATCC 7469 | <i>Lacticaseibacillus rhamnosus</i>  | //                 | ATCC 7469                            |
| LRM          | <i>Lacticaseibacillus rhamnosus</i>  | Microbiosys        | Rosell/GG                            |
| LRD          | <i>Lacticaseibacillus rhamnosus</i>  | Dicoflor           | GG                                   |
| LP           | <i>Lactiplantibacillus plantarum</i> | Biotics G          | WCFS1                                |
| LF           | <i>Limosilactobacillus fermentum</i> | Urotab             | DSM 25176                            |
| LPA          | <i>Lacticaseibacillus paracasei</i>  | Biotics G          | W20                                  |
| LA           | <i>Lactobacillus acidophilus</i>     | Nature's Bounty    | LA-14                                |

**Table S2.** Characterization of *P. aeruginosa* strains isolated from CF patients

| Strain code | Sex | Age | Disease stage | Mucoid phenotype (Yes/Not) |
|-------------|-----|-----|---------------|----------------------------|
| PaCF1       | F   | 18  | Chronic       | N                          |
| PaCF4       | F   | 18  | Chronic       | Y                          |
| PaCF11      | M   | 20  | Chronic       | Y                          |

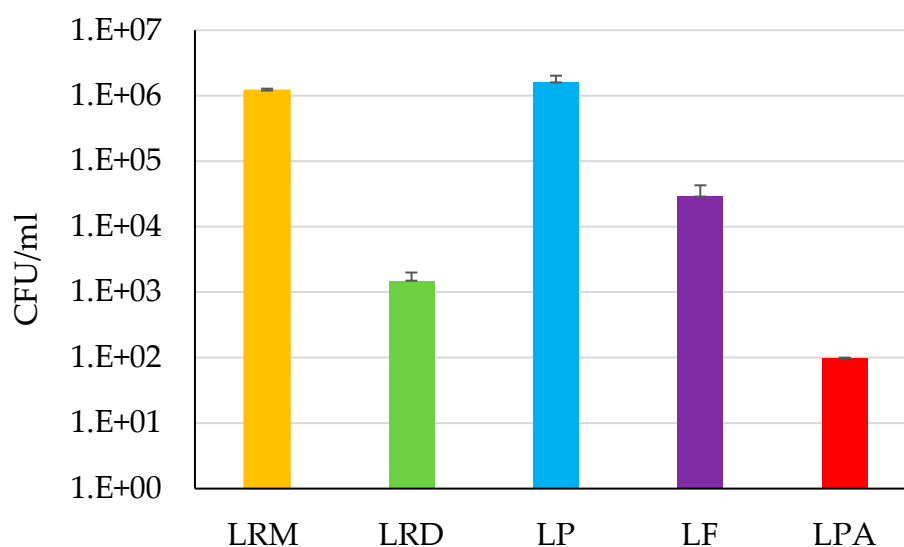

**Figure S1.** Ability of lactobacilli to grow/survive in artificial sputum medium (ASM) without glucose, starting from an inoculum of 10<sup>5</sup> CFU/ml. The figure reports the CFU number of the different lactobacilli strains after 24 h of incubation in ASM. Results are shown as mean ± standard error of the mean values (n= 3). LRM and LP showed ability to grow in ASM without glucose although at a lower extent as compared to the presence of glucose (1 Log increase *versus* approximately 3 Logs increase, Figure 1). In contrast, the viable number of LRD, LF and LPA decreased in such conditions.

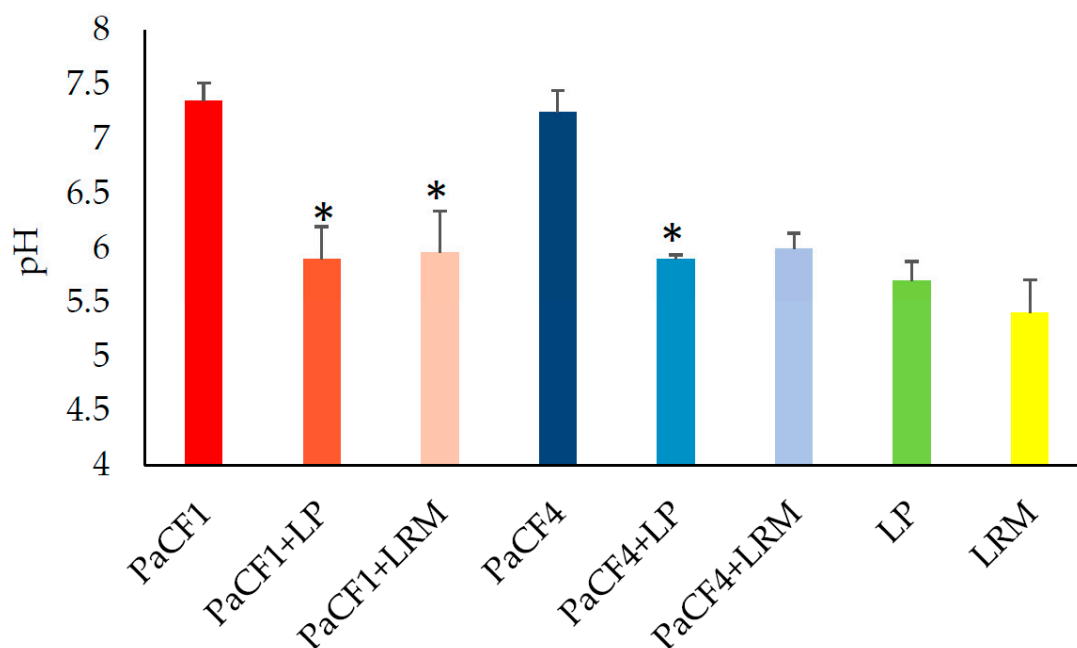

**Figure S2.** pH values measured by pH-indicator strips in liquid cultures of PaCF1 and PaCF4 alone, and co-cultured with LP and LRM. Lactobacilli were grown in ASM for 9 h before adding *P. aeruginosa*, and the incubation of both bacterial strains was prolonged for an additional 13 h. Results are shown as mean  $\pm$  error standard of the mean (n= 7). Statistical significance was evaluated by ANOVA followed by Tukey-Kramer post-hoc test. \* $p<0.05$ .

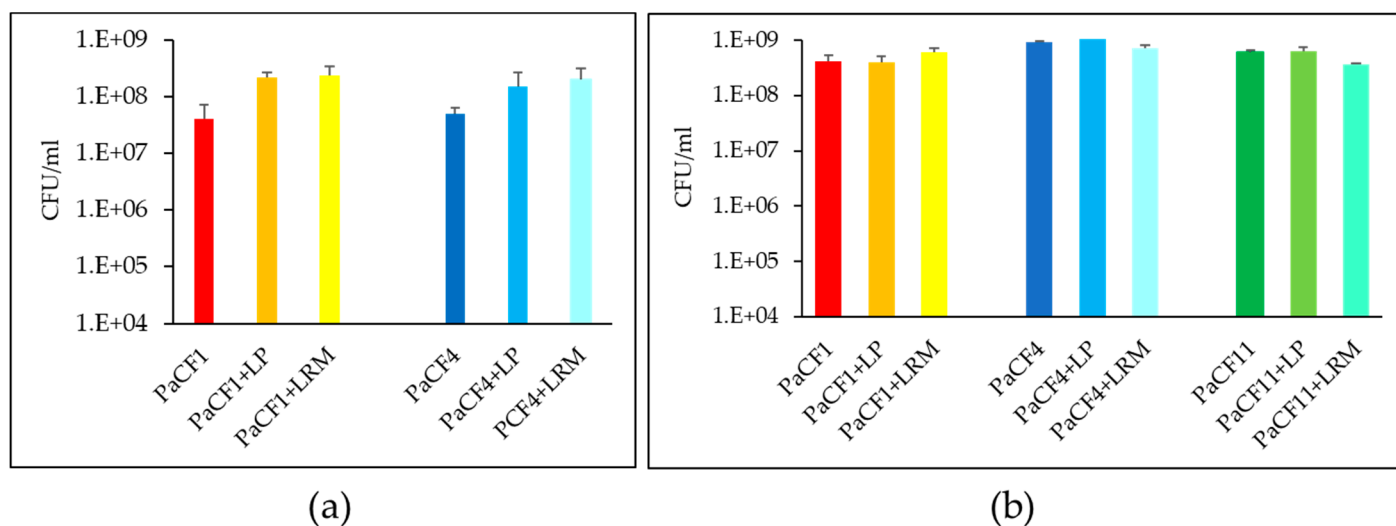

**Figure S3.** Effects of LP and LRM (tested at  $10^8$  CFU/mL) on the formation of biofilm by PaCF1 and PaCF4 (a) and on preformed biofilm of PaCF1, PaCF4 and PaCF11 (b). CFU counts of biofilm-associated *P. aeruginosa* were assessed at the end of the incubation period following the washing of the unattached bacteria. Results are shown as mean  $\pm$  standard error of the mean (n= 3).
